# Supplementary figures and images for: Exploring the binding properties of agonists interacting with human TGR5 using structural modeling, molecular docking and dynamics simulations
Source: Royal Society of Chemistry journal article supplement (doi:10.1039/c4ra16617e), 2015-01-01

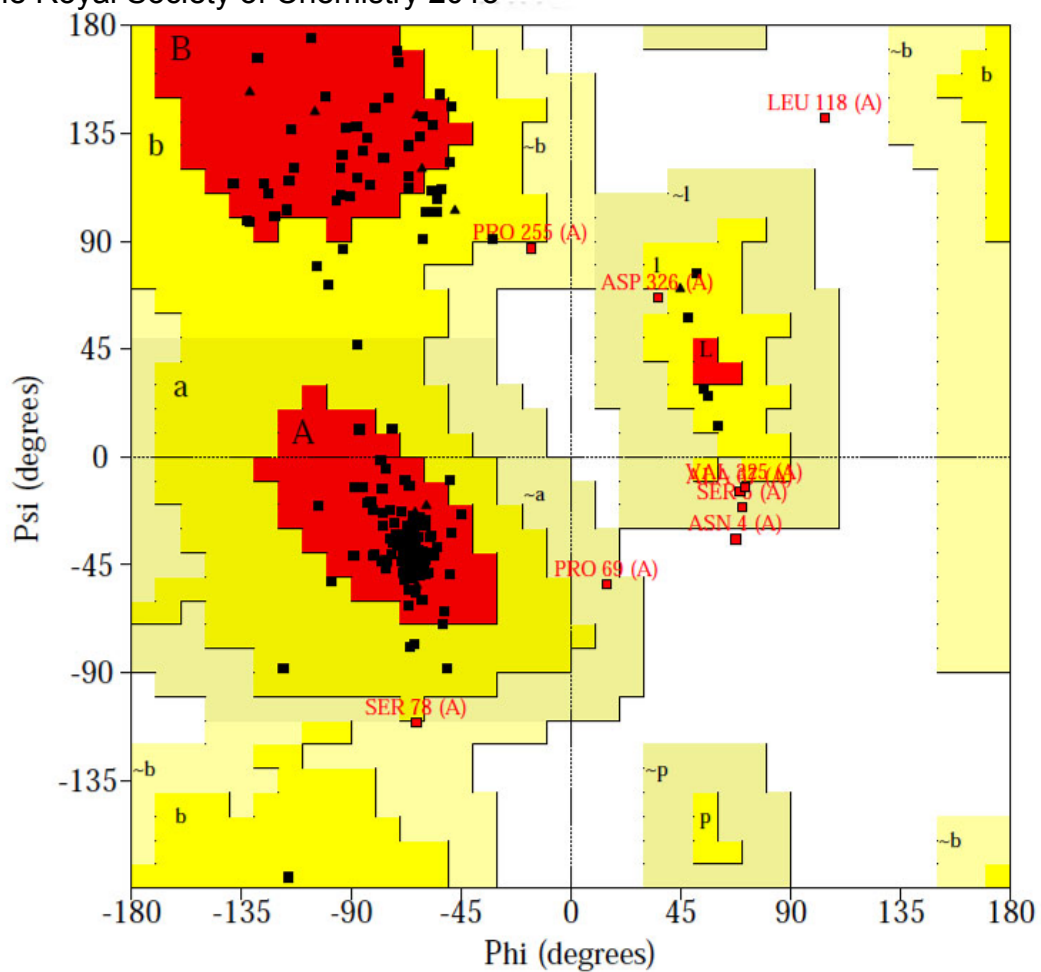

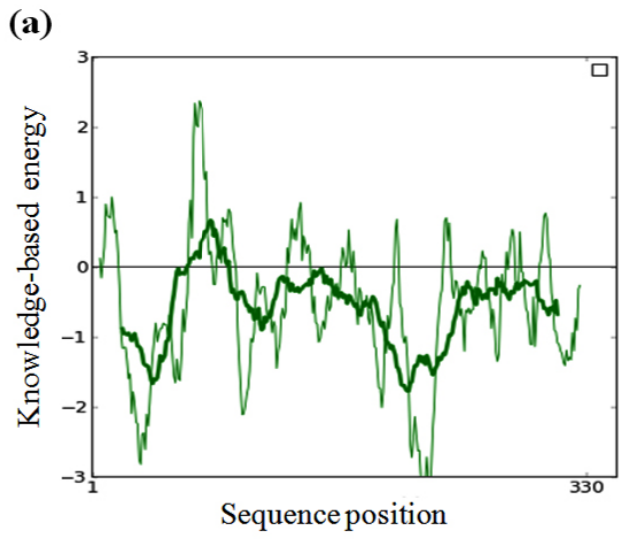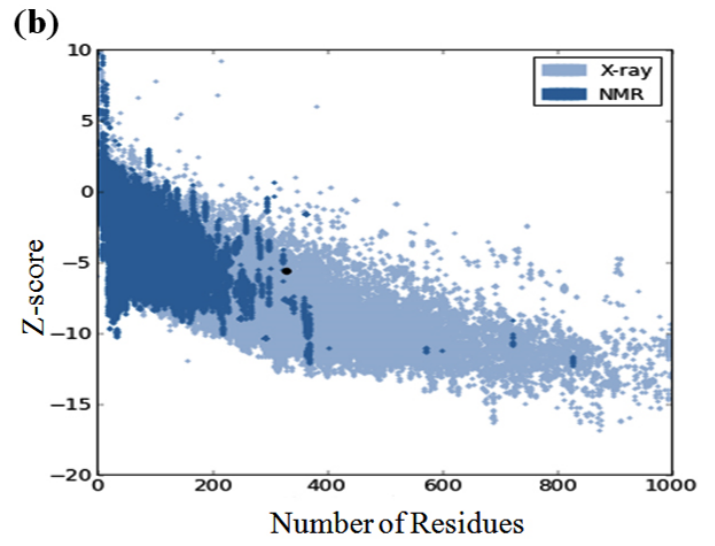

**(a)** Covariance

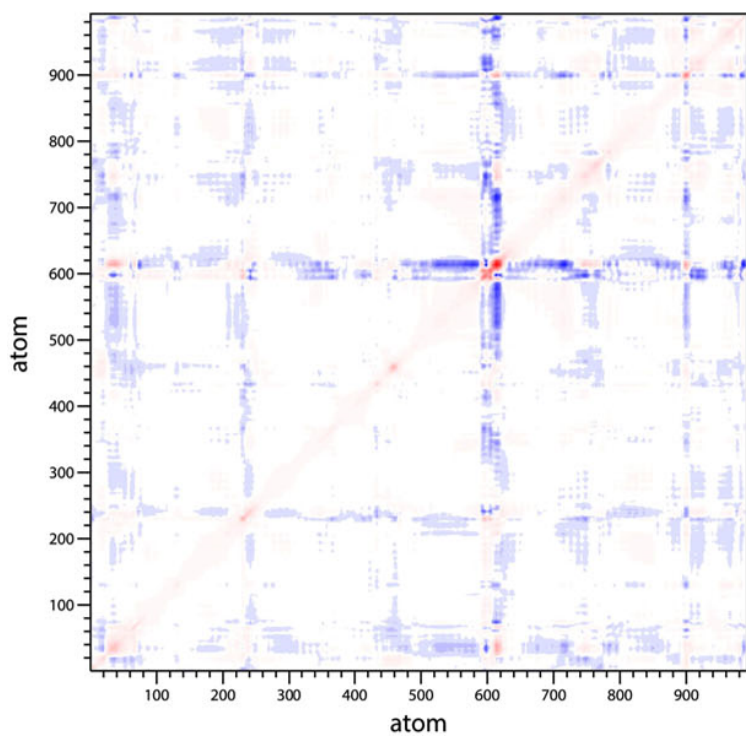

**(b)** Covariance

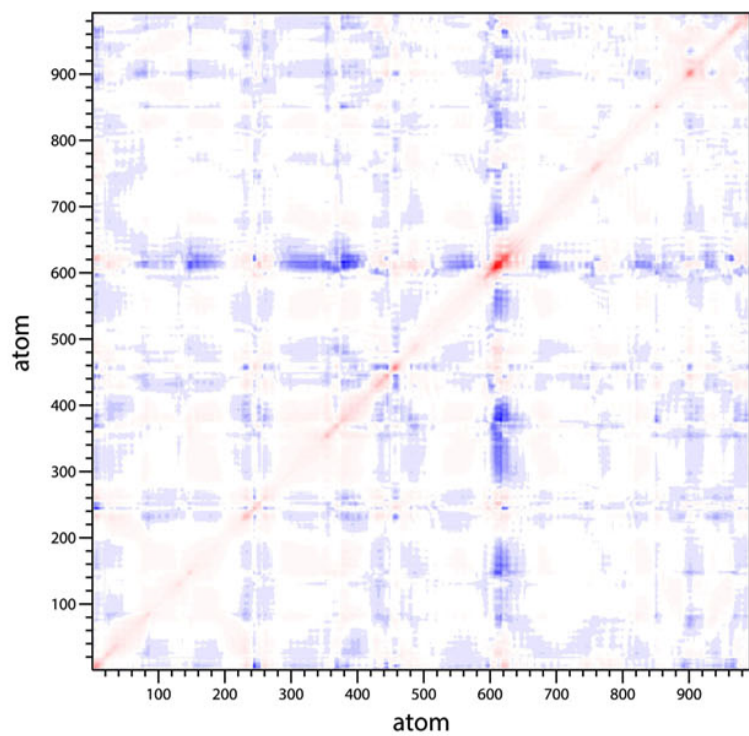

Covariance

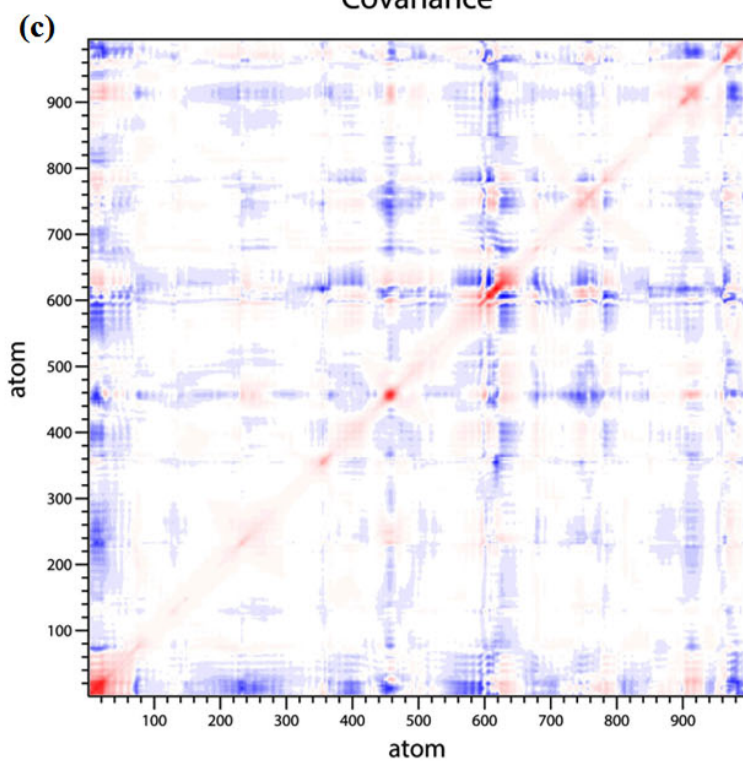

Supplement: c4ra16617e1.pdf [file c4ra16617e1.pdf]
